# Supplementary material for: Constructing the coordination environment of Se–O in Cu2−xSe for electrochemical hydrogen evolution
Source: Royal Society of Chemistry journal article supplement (doi:10.1039/d3cc04054b), 2023-01-01
Supplement: d3cc04054b1.pdf [file d3cc04054b1.pdf]

## Supporting Information

### Experimental Section

#### The synthesis of $\text{Cu}_{2-x}\text{Se}$ :

20 mg of Se powder and 2 g of [Bmim] Cl were mixed and heated to 80 °C under stirring and maintained for 30 min. Then 19 mg of  $\text{NaBH}_4$  and 10 mL of deionized water were added, and stirring was continued for another 10 min. After that, 28 mg of Cu powder was added into the above solution, and the autoclaves were sealed and maintained at 180 °C for 10 h. After accomplishing the reaction, we cooled the autoclave to room temperature naturally, and the product was separated by centrifugation, washed with distilled water and ethanol several times, and dried in a vacuum at 60 °C overnight.

#### The synthesis of $\text{Cu}_2\text{O}(\text{SeO}_3)$ :

The synthetic  $\text{Cu}_{2-x}\text{Se}$  is calcined in air at 500°C for 2 h.

### Characterization of Catalysts

Powder X-ray diffraction (XRD) patterns were recorded on a D8 Venture (Bruker, Germany) using Cu  $K\alpha$  radiation ( $\lambda=1.5418 \text{ \AA}$ ) in the range of 10-80° with a scanning speed of 5°  $\text{min}^{-1}$ . The morphology and structure of the samples were observed by scanning electron microscopy (SEM, JSM 7800F) and high-resolution transmission electron microscopy (HRTEM, FEI TecnaiG2 S-Twin) with a field emission gun operating at 200 kV. X-ray photoelectron spectroscopy (XPS, ESCALAB-250) was carried out with Thermo ESCA Lab 250 analyzer operating at constant analyzer power mode.

### Electrochemical measurement

Electrochemical measurements were conducted at the CHI 660E electrochemical workstation (Shanghai Chenhua Apparatus, China) using a standard three-electrode system, with a rotating disk electrode (7 mm in diameter) as the working electrode, a platinum slice as the counter electrode, and a Ag/AgCl as the reference electrode in 0.5 M  $\text{H}_2\text{SO}_4$ . The working electrode was prepared by polishing it with 50 nm  $\alpha\text{-Al}_2\text{O}_3$  on a polishing cloth, then dropping 7  $\mu\text{L}$  of the catalyst ink and drying it naturally. The catalyst ink was made by 0.005g adding 300  $\mu\text{L}$  of deionized water and 200  $\mu\text{L}$  of ethanol and 10  $\mu\text{L}$  of Nafion solution, and then the solution was treated with ultrasonic for half an hour to make sure samples were well dispersed. The electrode was activated and the surface bubbles of it were removed by running cyclic voltammety (CV). The HER curve was scanned from -0.9 to -0.2 V (vs Ag/AgCl) with a scan rate of 5 mV/s in 0.5 M  $\text{H}_2\text{SO}_4$ . Electrochemical impedance spectroscopy (EIS) was obtained at -0.6 V (vs Ag/AgCl) with frequencies ranging from 100 kHz to 0.1 Hz within an AC voltage

of 5 mV.

### **Density Functional Theory Calculations**

The density function calculations were performed using Vienna ab initio simulation package (VASP) with the projector augmented-wave (PAW) method <sup>[1, 2]</sup>. The generalized gradient approximation (GGA) functional parametrized by Perdew-Burke-Ernzerh of (PBE) was employed to describe the exchange correlation potential <sup>[3]</sup>. A plane-wave energy cutoff of 400 eV was used and the energies and forces on each atom were converged to  $10^{-4}$  eV and 0.05 eV/Å, respectively. A gamma-only point was used for the Brillouin zone integrations in geometry optimization.

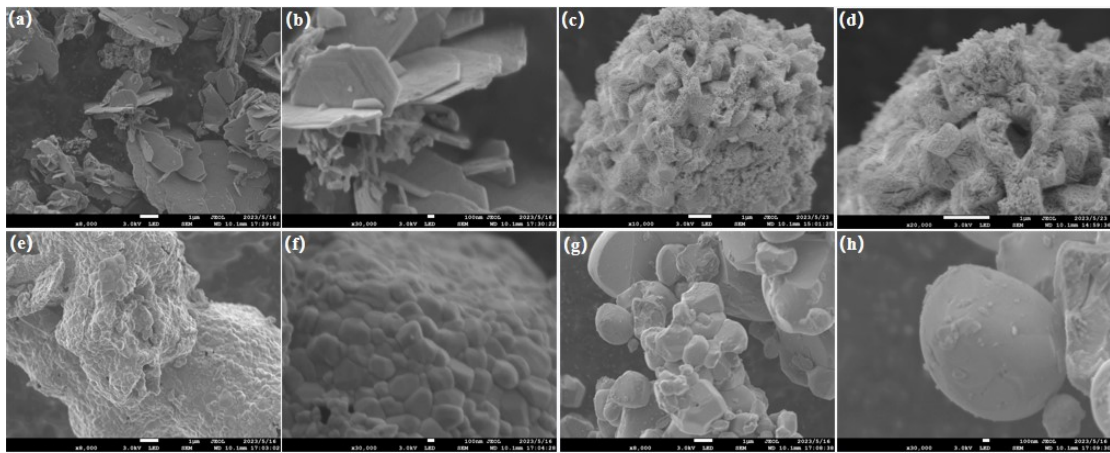

Fig. S1 SEM images of (a-b)  $\text{Cu}_{2-x}\text{Se}$ , (c-d)  $\text{Cu}_2\text{O}(\text{SeO}_3)$ , (e-f)  $\text{CuO}$ , and (g-h)  $\text{Cu}_2\text{O}$ .

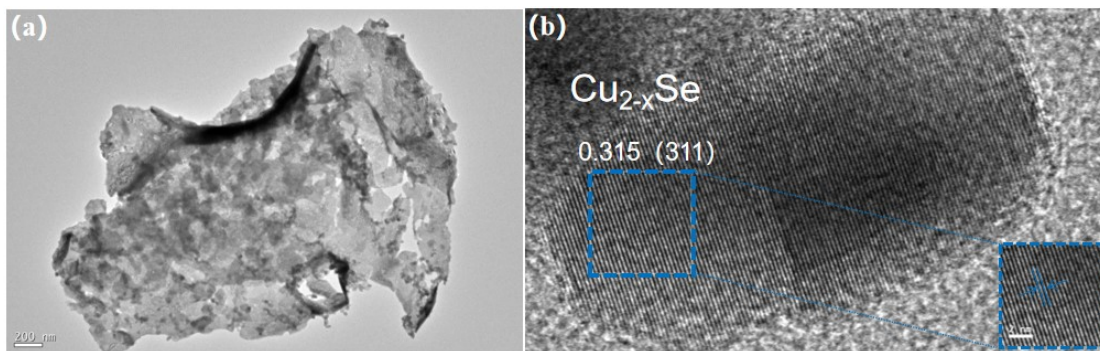

Fig. S2 TEM images of (a)  $\text{Cu}_{2-x}\text{Se}$  and HRTEM images of (b)  $\text{Cu}_{2-x}\text{Se}$ .

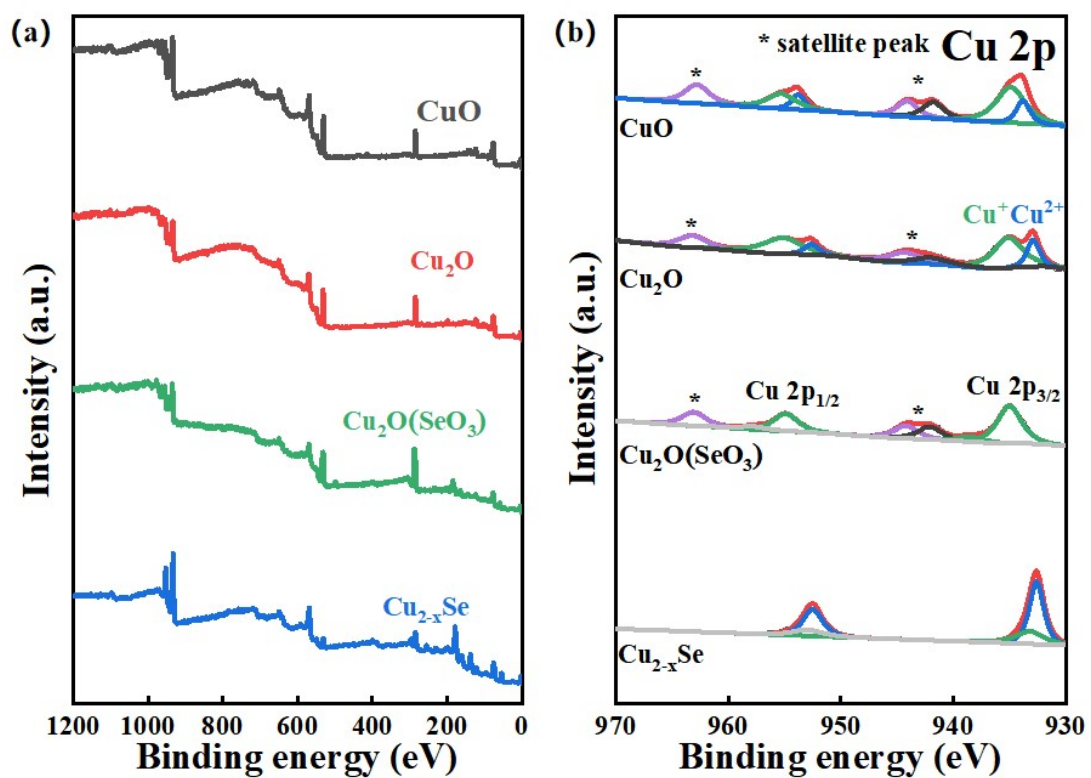

Fig. S3 XPS surface analysis of Cu<sub>2-x</sub>Se, Cu<sub>2</sub>O(SeO<sub>3</sub>), Cu<sub>2</sub>O, and CuO. (a) Survey and (b) 2p.

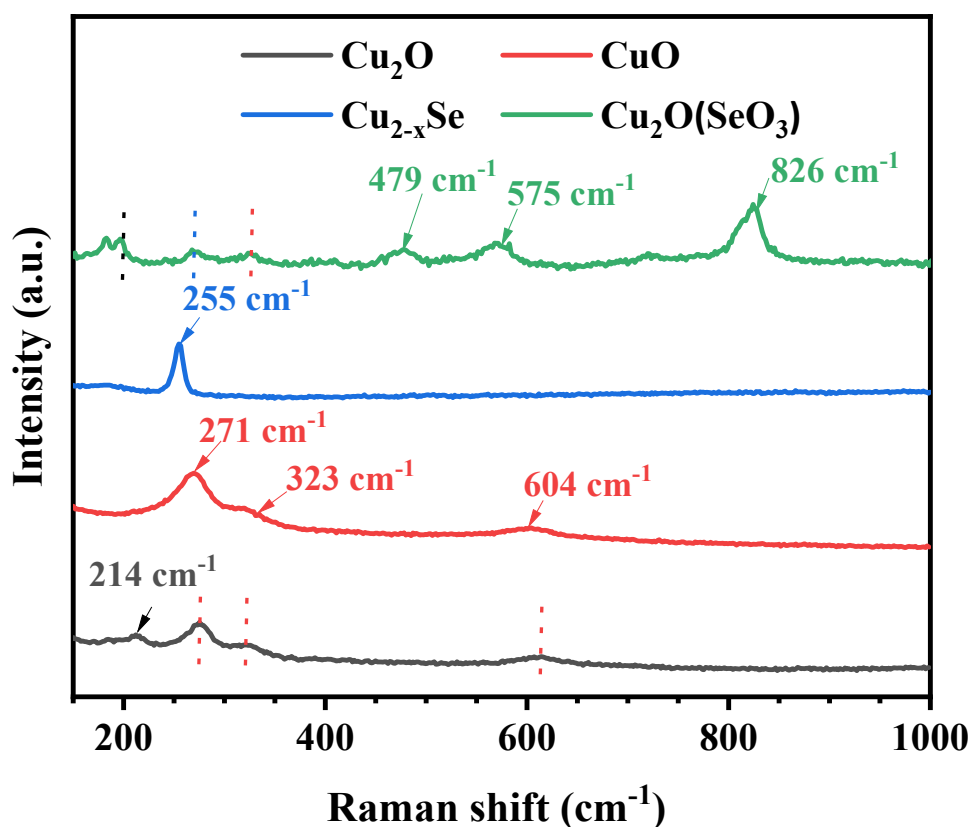

Fig. S4 The Raman of  $\text{Cu}_2\text{O}(\text{SeO}_3)$ ,  $\text{Cu}_{2-x}\text{Se}$ ,  $\text{CuO}$ , and  $\text{Cu}_2\text{O}$ .

A strong peak observed at  $255\text{ cm}^{-1}$  can be assigned to the Se–Se stretching vibration in  $\text{Cu}_{2-x}\text{Se}$ , which is consistent with the previous reports. And the spectrum of  $\text{CuO}$  exhibits three main one-phonon modes at  $271$ ,  $323$  and  $604\text{ cm}^{-1}$ , respectively. The peak at  $271\text{ cm}^{-1}$  could be identified to the  $A_g$  mode of vibration, while the other two peaks at  $323$  and  $604\text{ cm}^{-1}$  would be assigned to the  $B_g$  modes. The Raman peak observed at  $214\text{ cm}^{-1}$  is from  $\text{CuO}$ . In addition, the strong peaks observed at  $479\text{ cm}^{-1}$ ,  $575\text{ cm}^{-1}$  and  $826\text{ cm}^{-1}$  of  $\text{Cu}_2\text{O}(\text{SeO}_3)$  are identified to  $\text{SeO}_3$ .<sup>[3-10]</sup>

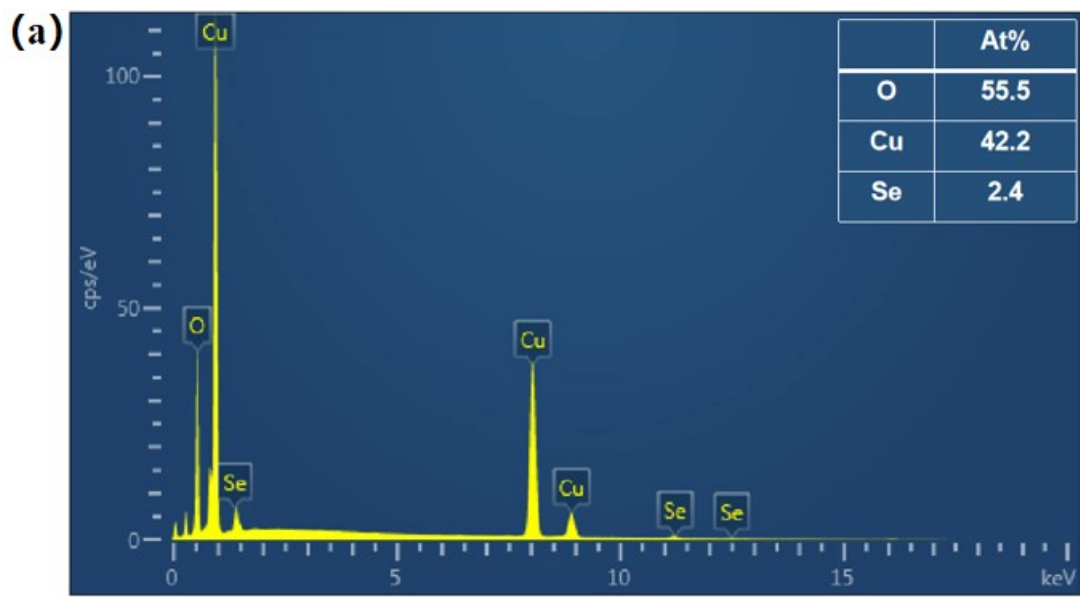

Fig. S5 EDS analysis for  $\text{Cu}_2\text{O}(\text{SeO}_3)$ .

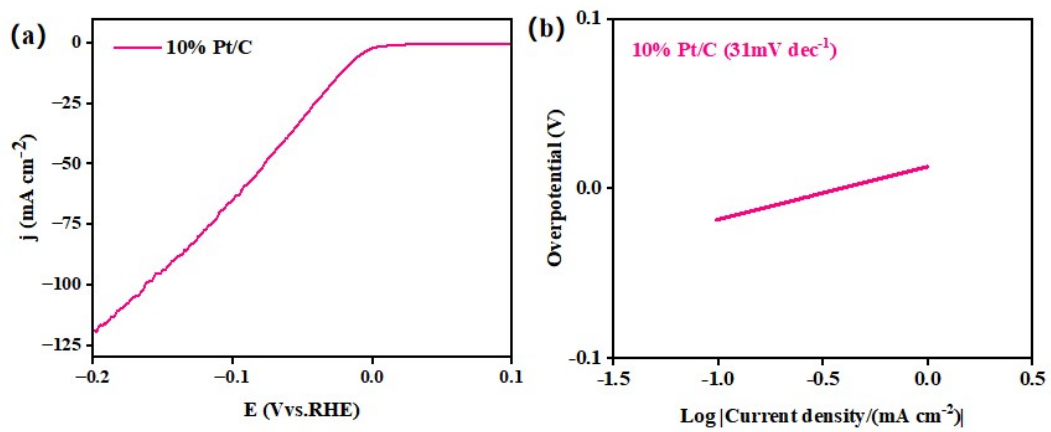

Fig. S6 (a) LSV curve and (b) corresponding Tafel plot of commercial 10% Pt/C.



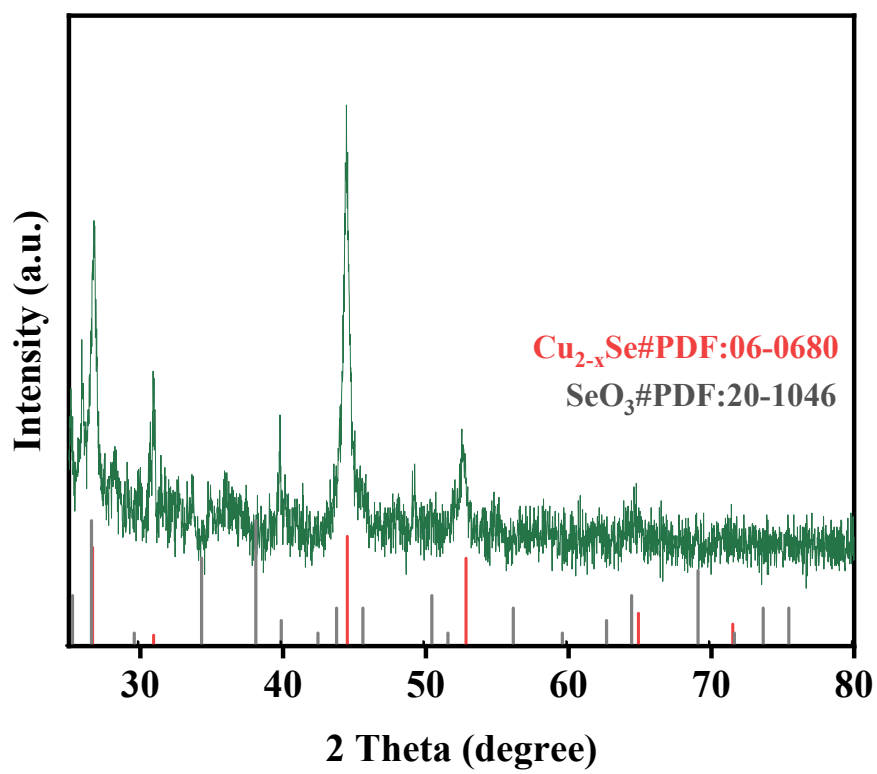

Fig. S7 The XRD of after testing  $\text{Cu}_2\text{O}(\text{SeO}_3)$ .

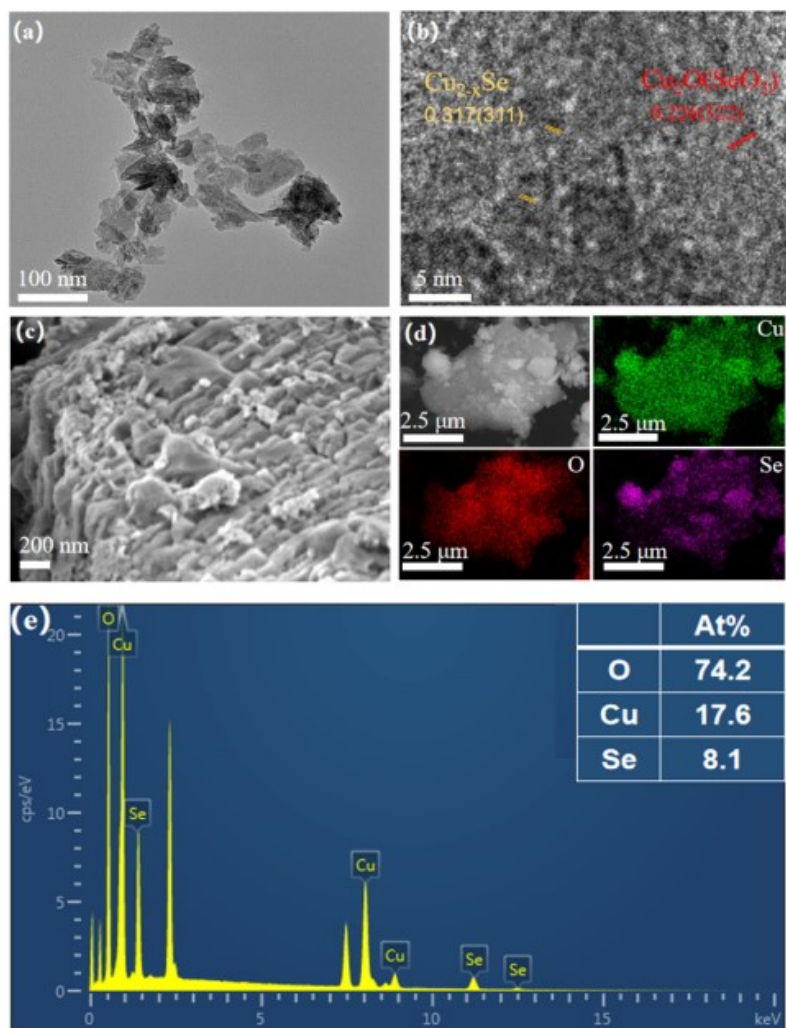

Fig. S8 (a-b) The TEM and HRTEM of after testing  $\text{Cu}_2\text{O}(\text{SeO}_3)$ . (c) The SEM of after testing  $\text{Cu}_2\text{O}(\text{SeO}_3)$ . (d-e) The EDS of after testing  $\text{Cu}_2\text{O}(\text{SeO}_3)$ .

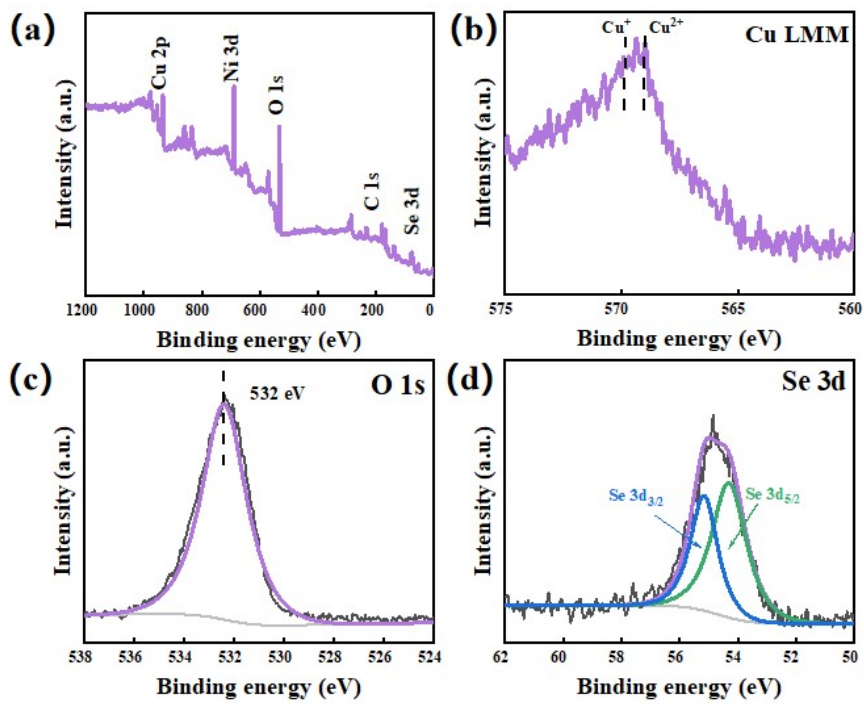

Fig. S9 (a-d) The XPS of after testing  $\text{Cu}_2\text{O}(\text{SeO}_3)$ .

Table S1 XPS and ICP results of  $\text{Cu}_{2-x}\text{Se}$  and  $\text{Cu}_2\text{O}(\text{SeO}_3)$ .

|                                     | XPS     |         | ICP     |                     |
|-------------------------------------|---------|---------|---------|---------------------|
|                                     | Element | Atomic% | Element | Average value (ppm) |
| $\text{Cu}_{2-x}\text{Se}$          | Cu      | 41.2    | Cu      | 28.3                |
|                                     | Se      | 29.3    | Se      | 19.7                |
|                                     | O       | 29.5    | /       | /                   |
| $\text{Cu}_2\text{O}(\text{SeO}_3)$ | Cu      | 21.6    | Cu      | 30.6                |
|                                     | Se      | 11.7    | Se      | 13.2                |
|                                     | O       | 66.7    | /       | /                   |

Table S2 The performance comparison between Cu<sub>2</sub>O(SeO<sub>3</sub>) and some recently reported Cu-based acidic HER catalysts.

| Catalyst                             | Current density (mA cm <sup>-2</sup> ) | Overpotential (mV) | Tafel slope (mV dec <sup>-1</sup> ) | Electrolyte                          | Reference                                                      |
|--------------------------------------|----------------------------------------|--------------------|-------------------------------------|--------------------------------------|----------------------------------------------------------------|
| Cu <sub>2</sub> O(SeO <sub>3</sub> ) | 10                                     | 438                | 136                                 | 0.5 M H <sub>2</sub> SO <sub>4</sub> | <b>This work</b>                                               |
| OE <sub>0</sub> -Cu                  | 10                                     | 489                | 154                                 | 0.5 M H <sub>2</sub> SO <sub>4</sub> | <i>Langmuir</i> . <b>2022</b> , 3,9, 2993-2999.                |
| Cu <sub>2-x</sub> Te/wet             | 10                                     | 432                | 280                                 | 0.5 M H <sub>2</sub> SO <sub>4</sub> | <i>Inorg. Chem.</i> <b>2020</b> , 59, 15, 11129-11141.         |
| CuS                                  | 10                                     | 449                | 171                                 | 0.5 M H <sub>2</sub> SO <sub>4</sub> | <i>Sci. Rep.</i> <b>2016</b> ,61 ,6, 1-11.                     |
| Cu <sub>2</sub> WS <sub>4</sub>      | 10                                     | 462                | 140                                 | 0.5 M H <sub>2</sub> SO <sub>4</sub> | <i>Materials</i> . <b>2022</b> , 16, 1, 299.                   |
| Cu NA/CF                             | 10                                     | 480                | 89                                  | 0.5 M H <sub>2</sub> SO <sub>4</sub> | <i>Nano Energy</i> . <b>2016</b> ,30,858-866.                  |
| Cu NPs                               | 10                                     | 530                | 132                                 | 0.5 M H <sub>2</sub> SO <sub>4</sub> | <i>Adv. Funct. Mater.</i> <b>2022</b> , 32, 18, 2112367        |
| Cu foam                              | 10                                     | 411                | 192                                 | 0.5 M H <sub>2</sub> SO <sub>4</sub> | <i>Adv. Funct. Mater.</i> <b>2022</b> , 32,18,2112367          |
| Cu <sub>2-x</sub> Te                 | 10                                     | 454                | 183                                 | 0.5 M H <sub>2</sub> SO <sub>4</sub> | <i>J. Phys. Chem. Lett.</i> <b>2021</b> , 12,47, 11585-11590.  |
| Cu NDs                               | 10                                     | 442                | 108                                 | 0.5 M H <sub>2</sub> SO <sub>4</sub> | <i>Int. J. Hydrog. Energy</i> . <b>2021</b> , 46,2, 2007-2017. |

Table S3 Comparison relating to the stability of different crystal planes.

|                       | <b>Cu<sub>2-x</sub>Se</b> |         | <b>Cu<sub>2</sub>O(SeO<sub>3</sub>)</b> |         |
|-----------------------|---------------------------|---------|-----------------------------------------|---------|
| <b>Crystal planes</b> | (111)                     | (311)   | (111)                                   | (322)   |
| <b>Energy (eV)</b>    | -322.76                   | -335.74 | -531.75                                 | -534.47 |

- [1] S. Nosé, *J. Chem. Phys.*, 1984, **81**, 511-519.
- [2] G. Kresse and D. Joubert, *Phys. Rev., B Condens. Matter*, 1999, **59**, 1758-1775.
- [3] J. Perdew, K. Burke and M. Ernzerhof, *Phys. Rev. Lett.*, 1997, **77**, 386.
- [4] K. Kremer and M. Johansson, *Inorg. Chem.*, 2018, **57**, 4640-4648.
- [5] K. Denisova, P. Lemmens, D. Wulferding, P. Berdonosov, V. Dolgikh, A. Murtazoev, E. Kozlyakova, O. Maximova, A. Vasiliev, I. Shchetinin, F. Dolgushin, A. Iqbal, B. Rahaman and T. Saha-Dasgupta, *J. Alloys Compd.*, 2022, **894**, 162291.
- [6] A. M. Qadir and I. Y. Erdogan, *Int. J. Hydrog. Energy*, 2019, **44**, 18694-18702.
- [7] K. R. Reddy, *J. Mol. Struct.*, 2017, **1150**, 553-557.
- [8] E. Filippo, D. Manno and A. Serra, *J. Alloys Compd.*, 2012, **538**, 8-10.
- [9] J. F. Xu, W. Ji, Z. X. Shen, W. S. Li, S. H. Tang, X. R. Ye, D. Z. Jia and X. Q. Xin, *J Raman Spectrosc.*, 1999, **30**, 413-415.
- [10] G. Jakubauskas, M. Gilic, E. Paluckiene, J. Mitric, J. Cirkovic, U. Ralevic, E. Usoviene, E. Griskonis and N. Petrasauskiene, *Chemosensors.*, 2022, **10**, 313.
